# Supplementary material for: Effects of Gas-Wall Partitioning in Teflon Tubing and Instrumentation on Time-Resolved Measurements of Gas-Phase Organic Compounds
Source: Copernicus journal article supplement (doi:10.5194/amt-2017-279), 2017-08-01
Supplement: Supplementary file 1 [file amt-2017-279-supplement.pdf]

Supplemental information for:

**Effects of Gas-Wall Partitioning in Teflon Tubing and Instrumentation on Time-Resolved Measurements of Gas-Phase Organic Compounds**

Demetrios Pagonis<sup>1,2</sup>, Jordan E. Krechmer<sup>1,2,3</sup>, Joost de Gouw<sup>1,4</sup>, Jose L. Jimenez<sup>1,2</sup>, and Paul J.

5 Ziemann<sup>1,2</sup>

<sup>1</sup>Cooperative Institute for Research in Environmental Sciences (CIRES), Boulder, Colorado 80309, United States

<sup>2</sup>Department of Chemistry and Biochemistry, University of Colorado, Boulder, Colorado 80309, United States

10 <sup>3</sup>Aerodyne Research, Inc., Billerica, Massachusetts 01821, United States

<sup>4</sup>NOAA Earth System Research Laboratory, Boulder, Colorado 80305, United States

## Supplemental Information

### Error introduced by approximating laminar flow as perfectly mixed flow

The error introduced by modeling flow through the bins as perfectly mixed rather than  
15 laminar is shown in Fig. S1. The concentration profile for laminar flow was produced using the  
residence time distribution  $E(t)$  shown in Eq. (S1).

$$E(t) = \frac{t_m^2}{2t^3} \quad (\text{S1})$$

where  $t_m$  is the mean residence time and  $t$  is the time elapsed (Fogler, 2006). The error introduced  
by modeling the flow as perfectly mixed is small, and this effect will only need to be accounted  
20 for when the tubing delays due to partitioning are very short (of the order of a few seconds), if  
more accurate results are desired.

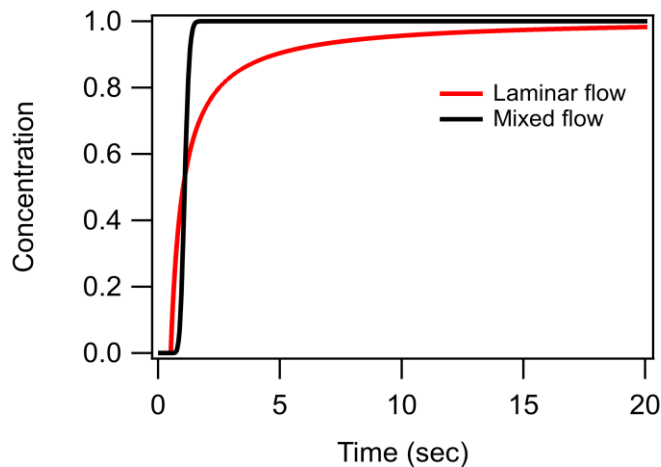

**Figure S1.** Simulated time profiles of compound concentrations at the tubing exit assuming flow  
in bins is perfectly mixed rather than laminar. The mixed flow profile was generated by running  
25 the model with gas-wall partitioning turned off. The profiles are for 1 m of tubing with 3/16 in.  
ID at a flow rate of 1 L min<sup>-1</sup>.

### References

Fogler, S. H.: Elements of chemical reaction engineering, 4th ed., Prentice Hall, Upper Saddle  
River, NJ., 2006.

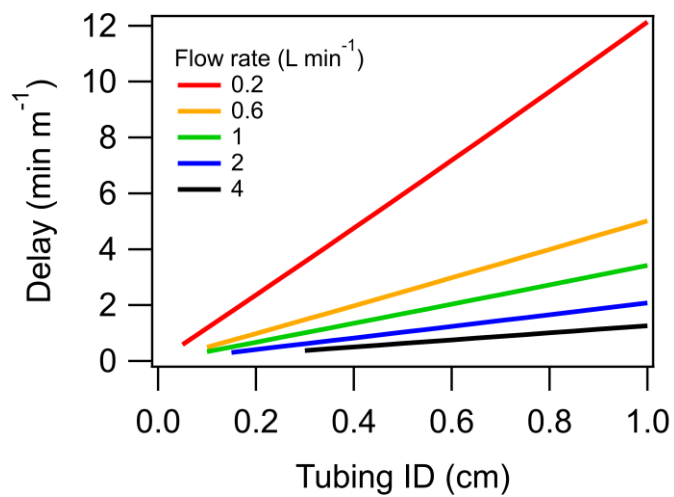

30

**Figure S2.** Simulated tubing delays presented as a function of tubing ID at various flow rates for a compound with  $c^* = 10^5 \mu\text{g m}^{-3}$  sampled through PFA tubing.

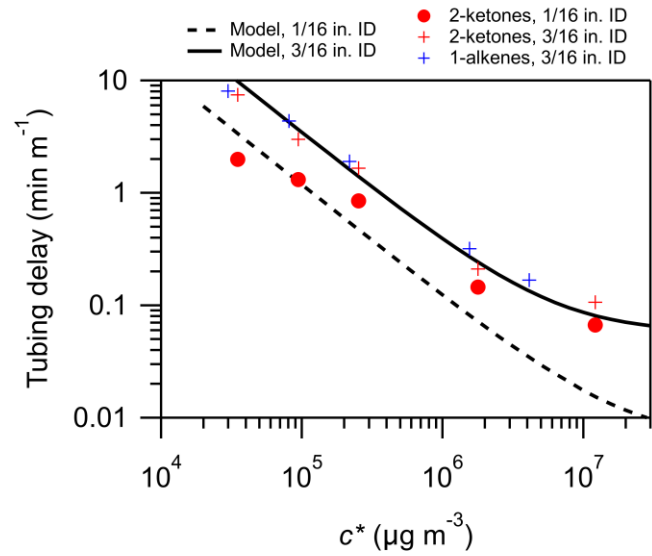

35 **Figure S3.** Comparison of measured and modeled tubing delays for 1/16 in. ID and 3/16 ID PFA Teflon tubing sampling at  $0.36 \text{ L min}^{-1}$ . Values of  $c^*$  were calculated using SIMPOL.1 (Pankow and Asher, 2007).

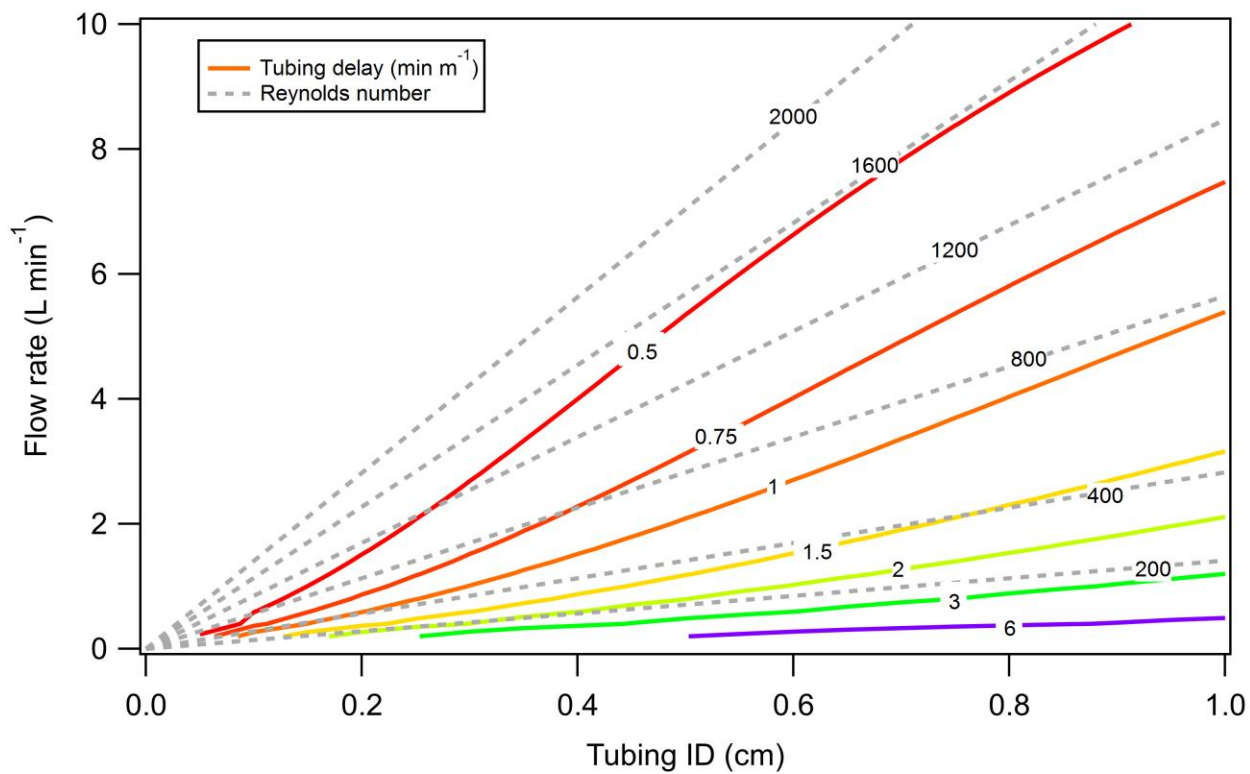

40 **Figure S4.** Simulated tubing delays presented as a function of tubing ID and flow rate for a compound with  $c^* = 10^5 \mu\text{g m}^{-3}$  sampled through PFA tubing. Reynolds numbers are overlaid to illustrate the nonlinear relationship between tubing delay, flow rate and tubing diameter.

## Convolving model output with instrument response time scale

When measuring gas-phase organic compounds one must account for delays arising from  
45 tubing and from instrument surfaces. The chromatography model developed here allows one to  
simulate the delays from tubing, and the procedure described in the text allows one to measure  
delays from the instrument. The instrument response  $R(t)$  is then the convolution of the tubing  
model output  $F(t)$  with the instrument response function  $I(t)$ , as in Eq. (S1).

$$R(t) = F(t) * I(t) = \int_0^{\infty} [F(t - \tau) \times I(\tau)] d\tau \quad (\text{S1})$$

50 This approach was evaluated by sampling a set of 2-ketones from an equilibrated environmental  
chamber into the PTR-MS in a 60 s pulse, with the PTR-MS sampling clean air before and after  
the pulse. The experiment was conducted with 1 m of 3/16 in. ID PFA tubing sampling at 0.36 L  
min<sup>-1</sup>. As seen in Fig. S5, the convolution of the model output with the instrument response  
function for each 2-ketone gives excellent agreement with the experimental data. For example, a  
55 60 s pulse of 1-tridecanone is convoluted to a response lasting more than 20 min, underscoring  
the importance of accounting for both tubing and instrument delays.

After the experiments described in this work were completed we removed all extraneous  
tubing from the inlet of the PTR-MS in an attempt to minimize the instrument response time for  
future work. This was a success, and we decreased the instrument response time by a factor of 5  
60 by reconfiguring the inlet. This result again shows the importance of minimizing the total  
amount of tubing in a sampling configuration when fast instrument response is needed.

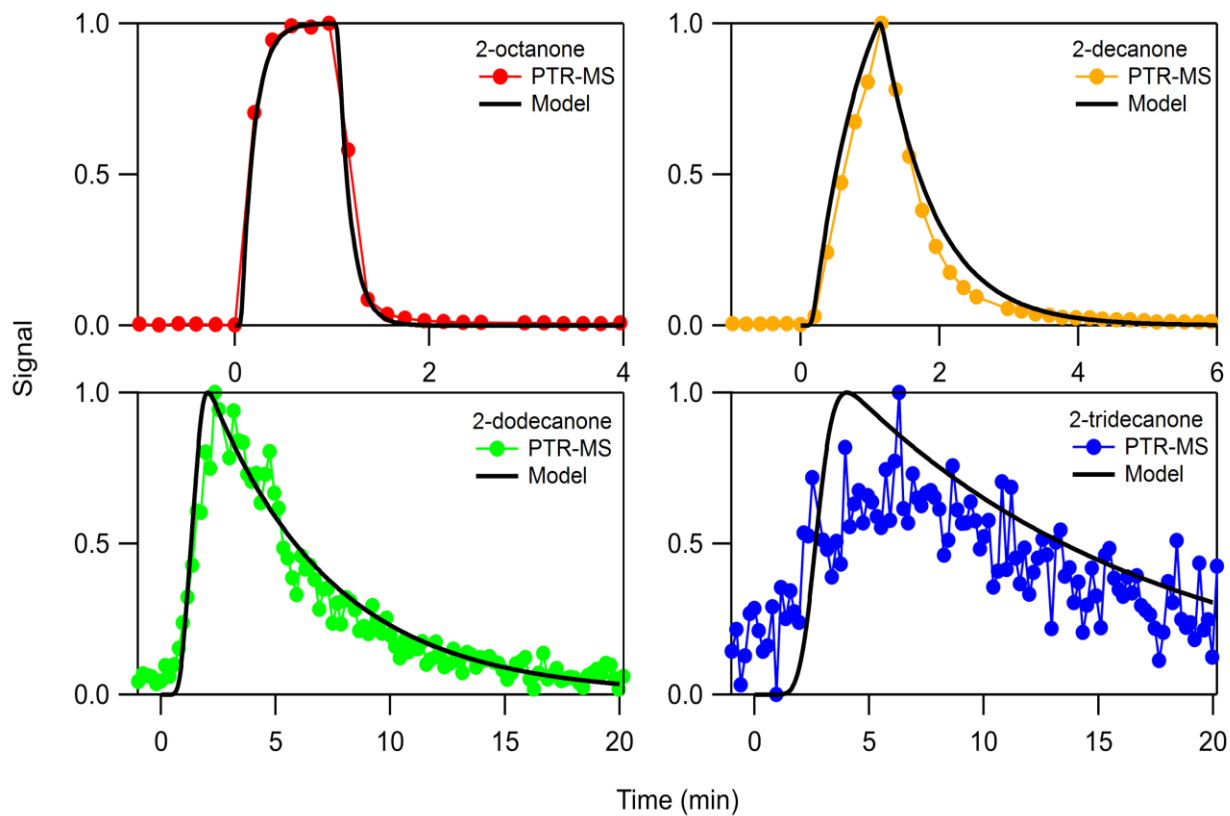

65 **Figure S5.** Measured and modeled time profiles for a 60-second pulse of 2-ketones measured by the PTR-MS through 1 m of 3/16 in. ID PFA Teflon tubing at  $0.36 \text{ L min}^{-1}$ . The tubing model output was convolved with the instrument response function for each 2-ketone to generate the profiles.
